# Supplementary material for: Bicontinuous Gyroid Phase of a Water-Swollen Wedge-Shaped Amphiphile: Studies with In-Situ Grazing-Incidence X-ray Scattering and Atomic Force Microscopy
Source: Materials (Basel). 2021 May 28;14(11):2892. doi: 10.3390/ma14112892 (PMC8198821; doi:10.3390/ma14112892)
Supplement: Supplementary file 1 [file materials-14-02892-s001.zip › materials-1235608-supplementary.pdf]

## Supplementary Materials for

### Bicontinuous gyroid phase of a water-swollen wedge-shaped amphiphile: studies with in-situ grazing-incidence X-ray scattering and atomic force microscopy

**Kseniia N. Graftskaia** <sup>1,2</sup>, **Azaliia F. Akhiamova** <sup>2,3</sup>, **Dmitry V. Vashurkin** <sup>2,5</sup>, **Denis S. Kotlyarskiy** <sup>2,5</sup>, **Diego Pontoni** <sup>3</sup>, **Denis V. Anokhin** <sup>1,2</sup>, **Xiaomin Zhu** <sup>6</sup>, **Dimitri A. Ivanov** <sup>1,2,4,5\*</sup>

<sup>1</sup> Moscow Institute of Physics and Technology, Institutskiy per. 9, Dolgoprudny, 141700, Russian Federation;

<sup>2</sup> Institute of Problems of Chemical Physics, Russian Academy of Sciences, Chernogolovka, Moscow Region, 142432, Russian Federation;

<sup>3</sup> Partnership for Soft Condensed Matter (PSCM), ESRF – The European Synchrotron, 71 avenue des Martyrs, 38043 Grenoble, France;

<sup>4</sup> Institut de Sciences des Matériaux de Mulhouse-IS2M, CNRS UMR 7361, Jean Starcky, 15, F-68057 Mulhouse, France

<sup>5</sup> Faculty of Chemistry, Lomonosov Moscow State University (MSU), GSP-1, 1-3 Leninskiye Gory, 119991 Moscow, Russia

<sup>6</sup> DWI – Leibniz-Institute for Interactive Materials e.V. and Institute for Technical and Macromolecular Chemistry of RWTH Aachen University, Forckenbeckstr. 50, D-52056, Aachen, Germany

\* Correspondence: dimitri.ivanov@uha.fr

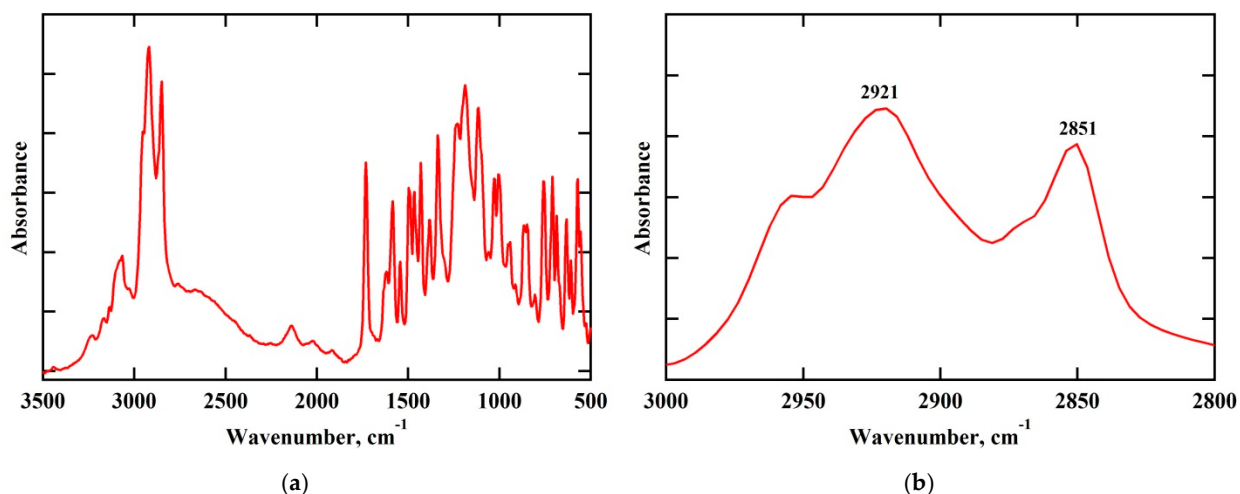

**Figure S1.** (a) FTIR spectrum of C8AzoPyr powder after long-term storage at room temperature; (b) magnified region of (a) with anti-symmetric and symmetric stretching vibration modes of  $\text{CH}_2$  groups.

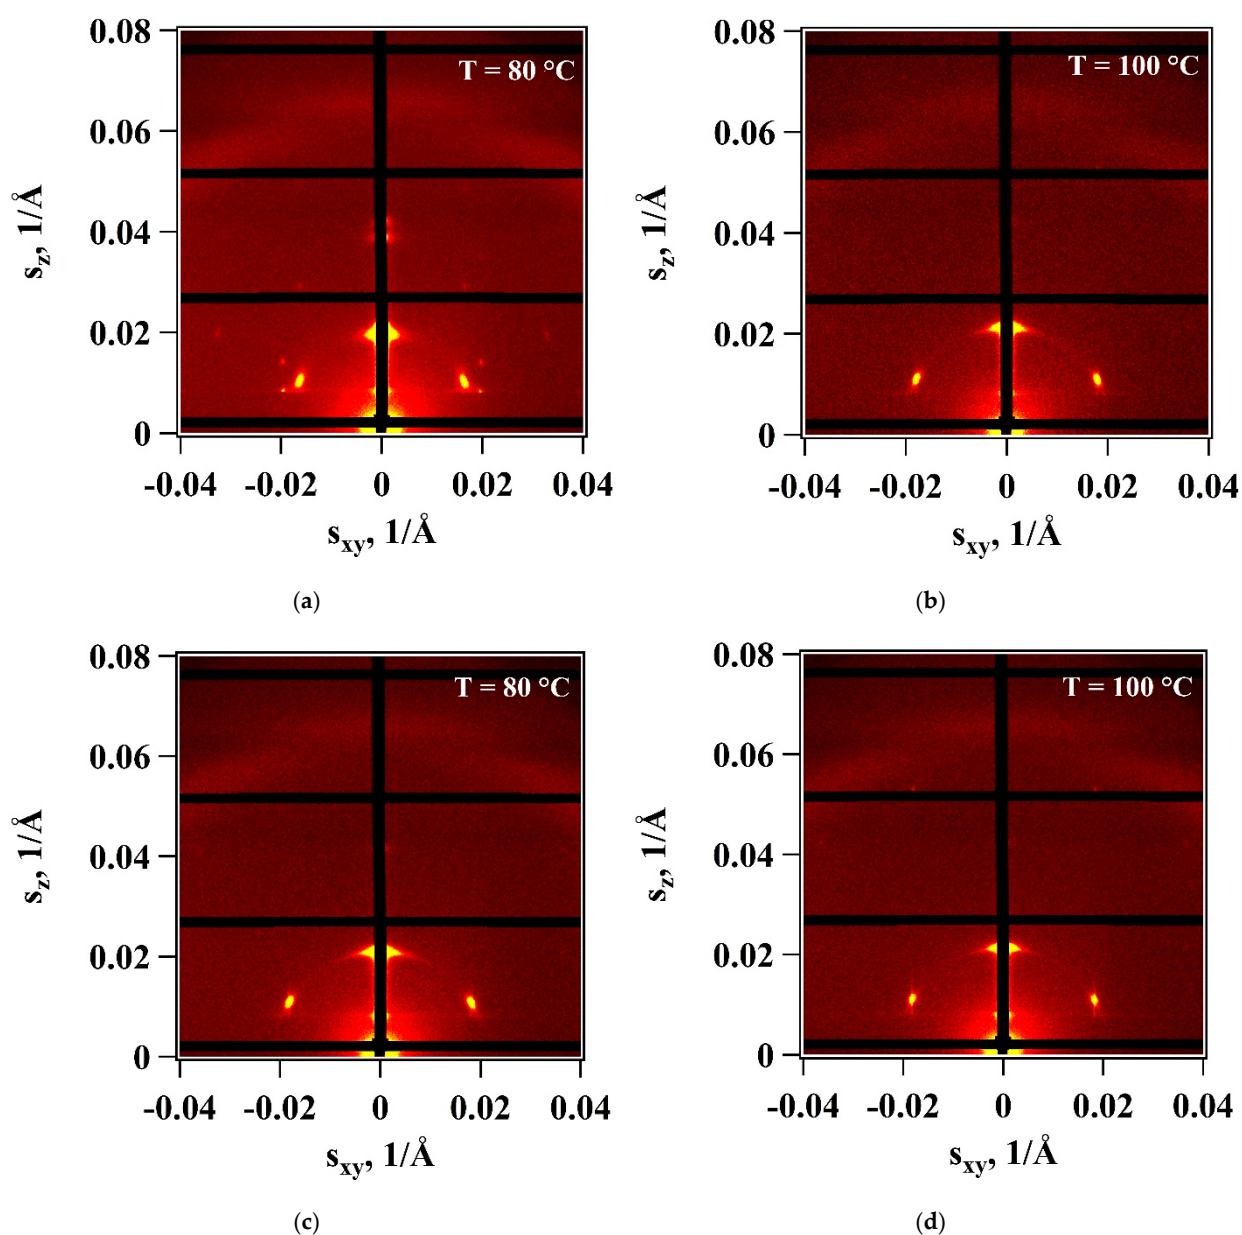

**Figure S2.** 2D GISAXS patterns of a dry C8AzoPyr thin film recorded during first heating from  $25^\circ\text{C}$  at  $80^\circ\text{C}$  (a) and at  $100^\circ\text{C}$  (b), and during second heating from  $25^\circ\text{C}$  at  $80^\circ\text{C}$  (c) and at  $100^\circ\text{C}$  (d).

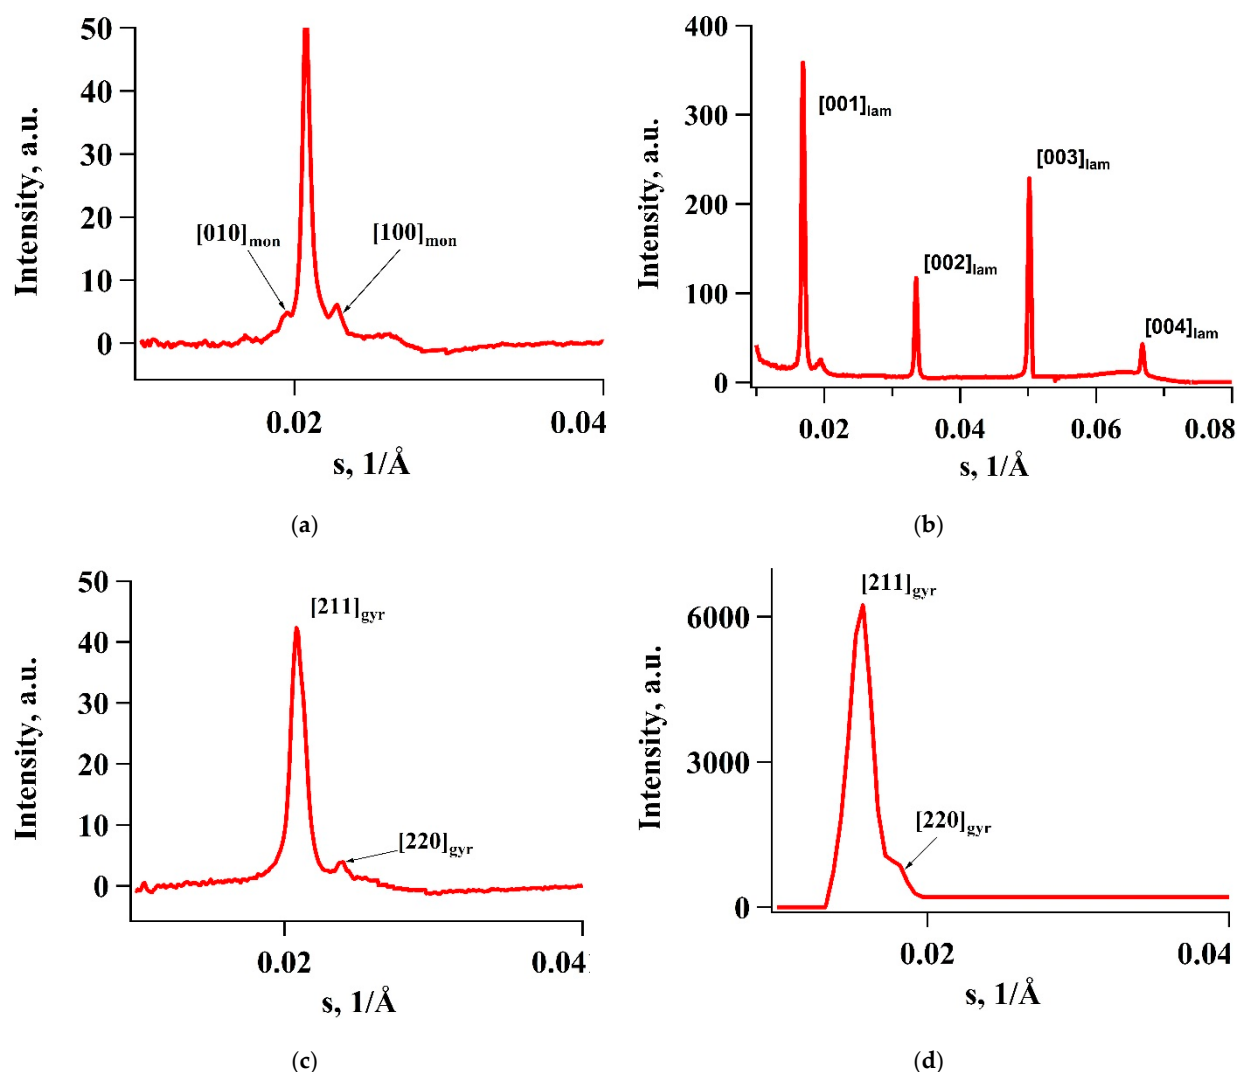

**Figure S3.** 1D-reduced GISAXS pattern of a dry C8AzoPyr thin film. (a) Columnar monoclinic ( $\text{Col}_{\text{mon}}$ ) phase formed after long-term annealing at room temperature; (b) lamellar phase ( $\text{lam}$ ) formed upon swelling in methanol vapors for two hours at room temperature; (c) double gyroid phase ( $\text{Cub}_{\text{gyr}}$ ) generated after long-term annealing at ambient conditions; (d)  $\text{Cub}_{\text{gyr}}$  phase swollen in water vapors for two days at room temperature.

## References

1. Gafskaia, K.N.; Anokhin, D.V.; Zimka, B.I.; Izdelieva, I.A.; Zhu, X.; Ivanov, D.A. An “on–off” switchable cubic phase with exceptional thermal stability and water sorption capacity. *Chem. Comm.* **2017**, *53*, 13217–13220.
